# Supplementary material for: Erfassung des Lesevolumens in Large-Scale Studien
Source: Atypon-hosted journal article supplement (doi:10.1026/0012-1924/a000203), 2018-06-28
Supplement: 0012-1924_a000203_esm1.pdf [file 0012-1924_a000203_esm1.pdf]

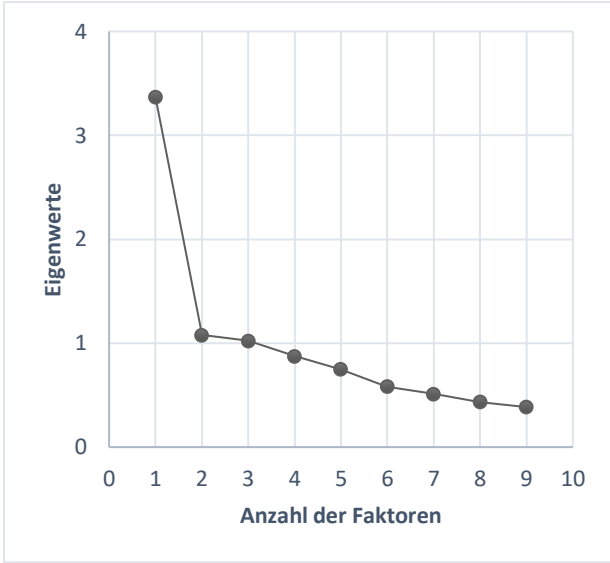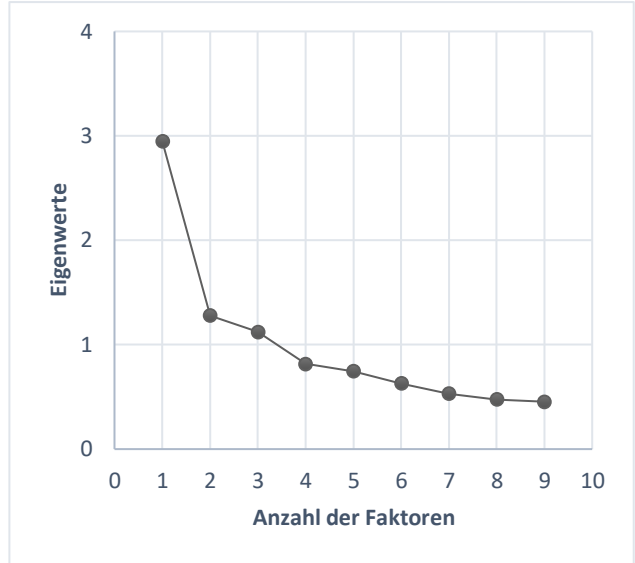

*Elektronisches Supplement 1.* Eigenwertverlauf basierend auf der Stichproben-Korrelationsmatrix der Explorative Faktorenanalyse in Startkohorte 3 (links) und Startkohorte 4 (rechts)
