# Supplementary material for: Erfassung des Lesevolumens in Large-Scale Studien
Source: Atypon-hosted journal article supplement (doi:10.1026/0012-1924/a000203), 2018-06-28
Supplement: 0012-1924_a000203_esm2.pdf [file 0012-1924_a000203_esm2.pdf]

*Elektronisches Supplement 2. Matrix des Drei-Faktoren-Modells in Klassenstufe fünf und neun*

| Item                                            | Stufe 5 |        |        | Stufe 9 |        |        |
|-------------------------------------------------|---------|--------|--------|---------|--------|--------|
|                                                 | Faktor  | Faktor | Faktor | Faktor  | Faktor | Faktor |
|                                                 | 1       | 2      | 3      | 1       | 2      | 3      |
| Lokale Tageszeitung                             | .646*   |        |        | .572*   |        |        |
| Boulevardzeitung (wie BILD, BZ)                 | .801*   |        |        | .750*   |        |        |
| Jugendseiten in anderen Zeitungen (wie SZ, FAZ) | .386    | .503*  |        | .418*   | .394*  |        |
| Magazine (wie SPIEGEL, FOCUS Schule)            | .402*   |        |        | .359*   | .418*  |        |
| andere Jugendzeitschriften (wie Bravo, Popcorn) | .425*   |        |        |         |        | .850*  |
| Krimis, Thriller, Horror- oder Fantasybücher    | .315*   |        |        |         | .518*  |        |
| klassische Literatur                            |         |        | .524*  |         | .652*  |        |
| Sachbücher                                      |         |        | .805*  |         | .665*  |        |
| Comics                                          | .317*   |        |        |         | .373*  |        |
| Cronbachs $\alpha$                              | .59     | -      | .55    | .52     | .51    | -      |
| Korrelation latenter Faktoren:                  |         |        |        |         |        |        |
| Faktor 1                                        |         | .36*   | .51*   |         | .38*   | .18*   |
| Faktor 2                                        |         |        | .32    |         |        | .04*   |

*Anmerkungen:* Rotationsmethode: oblimin. Kleine Koeffizienten unter .30 wurden in der Tabelle nicht dargestellt.

Die interne Konsistenz in Klassenstufe fünf wurde berechnet auf Basis folgender Items: Faktor 1: Tageszeitungen, Boulevardzeitungen, Jugendseiten, Magazine und Jugendzeitschriften; Faktor 2: klassische Literatur und Sachbücher.

Die interne Konsistenz in Klassenstufe neun wurde berechnet auf Basis folgender Items: Faktor 1: Tageszeitungen; Boulevardzeitung; Faktor 2: Jugendseiten, Magazine, Krimis, Thriller, Horror- oder Fantasybücher, klassische Literatur, Sachbücher und Comics. \*  $p < .05$ .
