# Supplementary material for: Erfassung des Lesevolumens in Large-Scale Studien
Source: Atypon-hosted journal article supplement (doi:10.1026/0012-1924/a000203), 2018-06-28
Supplement: 0012-1924_a000203_esm3.pdf [file 0012-1924_a000203_esm3.pdf]

*Elektronisches Supplement 3. Kendall-Tau-Interkorrelationen der Skalen und Kriteriumsvariablen von Klassenstufe fünf (unter der Diagonale) und Klassenstufe neun (über der Diagonale)*

| Variablen                     | 1     | 2    | 3    | 4    | 5    |
|-------------------------------|-------|------|------|------|------|
| 1. Faktor 1                   | –     | .24* | .06* | .10* | .04* |
| 2. Faktor 2                   | .27*  | –    | .08* | .35* | .27* |
| 3. Lesekompetenz              | -.05* | .00  | –    | .23* | .24* |
| 4. Lesebezogene Einstellungen | .18*  | .29* | .15* | –    | .44* |
| 5. Globalurteil               | .12*  | .20* | .20* | .44* | –    |

*Anmerkungen:* Die geringe Reliabilität der gebildeten Faktoren/Skalen ist einschränkend zu berücksichtigen. Korrelationen basieren auf manifesten Variablen. Die Faktoren in Klassenstufe fünf wurden aus den Mittelwerten folgender Items gebildet: Faktor 1: Tageszeitungen, Boulevardzeitungen, Jugendseiten, Magazine und Jugendzeitschriften; Faktor 2: klassische Literatur und Sachbücher. Die Faktoren in Klassenstufe neun wurde gebildet aus den Mittelwerten folgender Items: Faktor 1: Tageszeitungen; Boulevardzeitung; Faktor 2: Jugendseiten, Magazine, Krimis, Thriller, Horror- oder Fantasybücher, klassische Literatur, Sachbücher und Comics. \*  $p < .05$ .
